# Supplementary material for: Identification of Differential N-Glycan Compositions in the Serum and Tissue of Colon Cancer Patients by Mass Spectrometry
Source: MDPI journal article supplement (doi:10.3390/biology10040343), 2021-04-20
Supplement: s1 [file s1]

# Identification of differential N-glycans in the serum and tissue of colon cancer patients by mass spectrometry

Marcelo de Melo Andrade Coura<sup>1,2\*</sup>, Eder Alves Barbosa<sup>2,3</sup>, Guilherme Dotto Brand<sup>3</sup>, Carlos Bloch Jr<sup>2</sup>, and Joao Batista de Sousa<sup>1</sup>

<sup>1</sup>Division of Colorectal Surgery, University Hospital of Brasilia, School of Medicine, University of Brasilia, Brasilia-DF, Brazil

<sup>2</sup>Laboratory of Mass Spectrometry, EMBRAPA Genetic Resources and Biotechnology, Brasilia-DF, Brazil

<sup>3</sup>Laboratory for the Synthesis and Analysis of Biomolecules, Institute of Chemistry, University of Brasilia, Brasilia-DF, Brazil

## Supplemental material 1

**Table S1.** Clinicodemographic characteristics of healthy individuals (control group) (n=11)

| Individuals | Genre | Age<br>(years) | Indication | Colonoscopy          |
|-------------|-------|----------------|------------|----------------------|
| 1           | F     | 67             | SCREENING  | Normal               |
| 2           | F     | 68             | SCREENING  | Diverticular disease |
| 3           | F     | 53             | SCREENING  | Normal               |
| 4           | F     | 50             | SCREENING  | Normal               |
| 5           | M     | 58             | SCREENING  | Diverticular disease |
| 6           | M     | 55             | SCREENING  | Normal               |
| 7           | M     | 56             | SCREENING  | Normal               |
| 8           | M     | 57             | SCREENING  | Normal               |
| 9           | M     | 61             | SCREENING  | Diverticular disease |
| 10          | M     | 61             | SCREENING  | Normal               |
| 11          | F     | 52             | SCREENING  | Normal               |

**Table S2.** N-glycan number, structure, accurate mass, mass used for quantification, corresponding adduct and the heavy reference number used for LC-MS and MALDI MS quantification methods.

| Number | Proposed structure, theoretical mass and composition                                                                                                   | Mass used for LCMS based quantification <sup>a</sup> | Adduct              | Serum Heavy reference <sup>b</sup> |       | Structure confirmed by MS/MS data <sup>c</sup> |
|--------|--------------------------------------------------------------------------------------------------------------------------------------------------------|------------------------------------------------------|---------------------|------------------------------------|-------|------------------------------------------------|
|        |                                                                                                                                                        |                                                      |                     | LC-MS                              | MALDI |                                                |
| 1      | 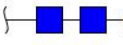<br>m/z: 1124.5572 [MONO,perMe,Na,0,freeEnd]<br><br>HexNAc2Hex1NeuAc1 | 1124.5572                                            | [M+Na] <sup>+</sup> | 13                                 | -     | -                                              |
| 2      | <br>m/z: 1171.5831 [MONO,perMe,Na,0,freeEnd]<br><br>HexNAc2Hex3       | 1171.5831                                            | [M+Na] <sup>+</sup> | 13                                 | -     | -                                              |
| 3      | <br>m/z: 1345.6723 [MONO,perMe,Na,0,freeEnd]<br><br>HexNAc2Hex3Fuc1 | 1345.6723                                            | [M+Na] <sup>+</sup> | 13                                 | -     | -                                              |
| 4*     | <br>m/z: 1375.6828 [MONO,perMe,Na,0,freeEnd]<br><br>HexNAc2Hex4     | 1375.6828*                                           | [M+Na] <sup>+</sup> | 13                                 | -     | -                                              |
| 5      | <br>m/z: 1416.7094 [MONO,perMe,Na,0,freeEnd]<br><br>HexNAc3Hex3     | 1416.7094                                            | [M+Na] <sup>+</sup> | 13                                 | -     | ✓✓                                             |

|    |                                                                                                                                                            |           |                       |    |   |    |
|----|------------------------------------------------------------------------------------------------------------------------------------------------------------|-----------|-----------------------|----|---|----|
| 6  | 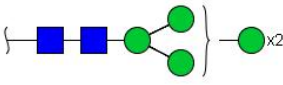 <p>m/z: 1579.7826 [MONO,perMe,Na,0,freeEnd]</p> <p>HexNAc2Hex5</p>       | 1579.7826 | [M+Na] <sup>+</sup>   | 52 | 6 | ✓  |
| 7  |  <p>m/z: 1590.7986 [MONO,perMe,Na,0,freeEnd]</p> <p>HexNAc3Hex3Fuc1</p>   | 1590.7986 | [M+Na] <sup>+</sup>   | 27 | - | -  |
| 8  |  <p>m/z: 1620.8091 [MONO,perMe,Na,0,freeEnd]</p> <p>HexNAc3Hex4</p>       | 1620.8090 | [M+Na] <sup>+</sup>   | 19 | - | *  |
| 9  |  <p>m/z: 1661.8357 [MONO,perMe,Na,0,freeEnd]</p> <p>HexNAc4Hex3</p>     | 842.4125* | [M+2Na] <sup>+</sup>  | 13 | - | ✓✓ |
| 10 |  <p>m/z: 1783.8824 [MONO,perMe,Na,0,freeEnd]</p> <p>HexNAc2Hex6</p>     | 903.4358  | [M+2Na] <sup>2+</sup> | 52 | 6 | ✓✓ |
| 11 |  <p>m/z: 1794.8984 [MONO,perMe,Na,0,freeEnd]</p> <p>HexNAc3Hex4Fuc1</p> | 908.9438  | [M+2Na] <sup>2+</sup> | 27 | - | -  |

|    |                                                                                                                                                              |            |                       |    |    |    |
|----|--------------------------------------------------------------------------------------------------------------------------------------------------------------|------------|-----------------------|----|----|----|
| 12 | 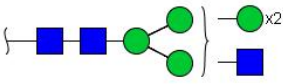 <p>m/z: 1824.9089 [MONO,perMe,Na,0,freeEnd]</p> <p>HexNAc3Hex5</p>         | 1824.9089  | [M+Na] <sup>+</sup>   | 52 | -  | -  |
| 13 |  <p>m/z: 1835.9249 [MONO,perMe,Na,0,freeEnd]</p> <p>HexNAc4Hex3Fuc1</p>     | 929.4571   | [M+2Na] <sup>2+</sup> | 13 | 13 | ✓✓ |
| 14 |  <p>m/z: 1865.9355 [MONO,perMe,Na,0,freeEnd]</p> <p>HexNAc4Hex4</p>         | 1865.9355  | [M+Na] <sup>+</sup>   | 19 | 19 | ✓✓ |
| 15 |  <p>m/z: 1906.9620 [MONO,perMe,Na,0,freeEnd]</p> <p>HexNAc5Hex3</p>       | 964.9756   | [M+2Na] <sup>2+</sup> | 13 | -  | -  |
| 16 |  <p>m/z: 1981.9828 [MONO,perMe,Na,0,freeEnd]</p> <p>HexNAc3Hex4NeuAc1</p> | 1002.4860  | [M+2Na] <sup>2+</sup> | 16 | -  | ✓✓ |
| 17 |  <p>m/z: 1987.9821 [MONO,perMe,Na,0,freeEnd]</p> <p>HexNAc2Hex7</p>       | 1005.4857* | [M+2Na] <sup>2+</sup> | 52 | 6  | ✓✓ |

|    |                                                                                                                                                            |            |                |    |    |    |
|----|------------------------------------------------------------------------------------------------------------------------------------------------------------|------------|----------------|----|----|----|
| 18 | 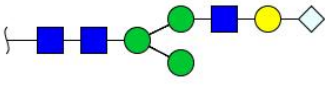 <p>m/z: 2011.9934 [MONO,perMe,Na,0,freeEnd]</p> <p>HexNAc3Hex4NeuGc1</p> | 1017.4913  | $[M+2Na]^{2+}$ | 35 | -  | -  |
| 19 |  <p>m/z: 2040.0247 [MONO,perMe,Na,0,freeEnd]</p> <p>HexNAc4Hex4Fuc1</p>   | 1031.5070  | $[M+2Na]^{2+}$ | 19 | 19 | ✓✓ |
| 20 |  <p>m/z: 2070.0352 [MONO,perMe,Na,0,freeEnd]</p> <p>HexNAc4Hex5</p>       | 1046.5122  | $[M+2Na]^{2+}$ | 52 | 27 | ✓✓ |
| 21 |  <p>m/z: 2081.0512 [MONO,perMe,Na,0,freeEnd]</p> <p>HexNAc5Hex3Fuc1</p> | 1052.0202  | $[M+2Na]^{2+}$ | 13 | 13 | -  |
| 22 |  <p>m/z: 2111.0618 [MONO,perMe,Na,0,freeEnd]</p> <p>HexNAc5Hex4</p>     | 1067.0255  | $[M+2Na]^{2+}$ | 19 | -  | *  |
| 23 |  <p>m/z: 2152.0883 [MONO,perMe,Na,0,freeEnd]</p> <p>HexNAc6Hex3</p>     | 1087.5388* | $[M+2Na]^{2+}$ | 13 | -  | ✓  |

|    |                                                                          |            |                       |    |    |    |
|----|--------------------------------------------------------------------------|------------|-----------------------|----|----|----|
| 24 | <p>m/z: 2186.0826 [MONO,perMe,Na,0,freeEnd]</p> <p>HexNAc3Hex5NeuAc1</p> | 1104.5359* | [M+2Na] <sup>2+</sup> | 52 | 35 | ✓✓ |
| 25 | <p>m/z: 2192.0819 [MONO,perMe,Na,0,freeEnd]</p> <p>HexNAc2Hex8</p>       | 1107.5356  | [M+2Na] <sup>2+</sup> | 52 | 6  | ✓✓ |
| 26 | <p>m/z: 2227.1091 [MONO,perMe,Na,0,freeEnd]</p> <p>HexNAc4Hex4NeuAc1</p> | 1125.0492  | [M+2Na] <sup>2+</sup> | 26 | 35 | ✓✓ |
| 27 | <p>m/z: 2244.1245 [MONO,perMe,Na,0,freeEnd]</p> <p>HexNAc4Hex5Fuc1</p>   | 1133.5568  | [M+2Na] <sup>2+</sup> | 27 | 27 | ✓✓ |
| 28 | <p>m/z: 2285.1510 [MONO,perMe,Na,0,freeEnd]</p> <p>HexNAc5Hex4Fuc1</p>   | 1154.0701  | [M+2Na] <sup>2+</sup> | 19 | 19 | ✓  |
| 29 | <p>m/z: 2315.1616 [MONO,perMe,Na,0,freeEnd]</p> <p>HexNAc5Hex5</p>       | 1169.0754  | [M+2Na] <sup>2+</sup> | 27 | -  | -  |

|    |                                                                                                                                                                   |           |                 |    |    |    |
|----|-------------------------------------------------------------------------------------------------------------------------------------------------------------------|-----------|-----------------|----|----|----|
| 30 | 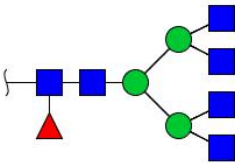 <p>m/z: 2326.1776 [MONO,perMe,Na,0,freeEnd]</p> <p>HexNAc6Hex3Fuc1</p>          | 1174.5834 | $[M+2Na]^{2+}$  | 13 | -  | -  |
| 31 |  <p>m/z: 2360.1718 [MONO,perMe,Na,0,freeEnd]</p> <p>HexNAc3Hex5Fuc1NeuAc1</p>    | 1191.5805 | $[M+2Na]^{2+}$  | 27 | -  | ✓✓ |
| 32 |  <p>m/z: 2390.1824 [MONO,perMe,Na,0,freeEnd]</p> <p>HexNAc3Hex6NeuAc1</p>       | 1206.5858 | $[M+2Na]^{2+}$  | 52 | 35 | ✓✓ |
| 33 |  <p>m/z: 2396.1817 [MONO,perMe,Na,0,freeEnd]</p> <p>HexNAc2Hex9</p>            | 1209.5855 | $[M+2Na]^{2+}$  | 52 | 6  | ✓✓ |
| 34 |  <p>m/z: 2401.1983 [MONO,perMe,Na,0,freeEnd]</p> <p>HexNAc4Hex74Fuc1NeuAc1</p> | 1220.0808 | $[M+Na+K]^{2+}$ | 34 | -  | ✓✓ |

|    |                                                                   |           |                |    |    |    |
|----|-------------------------------------------------------------------|-----------|----------------|----|----|----|
| 35 | <br>m/z: 2431.2089 [MONO,perMe,Na,0,freeEnd]<br>HexNAc4Hex5NeuAc1 | 1227.0991 | $[M+2Na]^{2+}$ | 35 | 35 | ✓✓ |
| 36 | <br>m/z: 2472.2355 [MONO,perMe,Na,0,freeEnd]<br>HexNAc5Hex4NeuAc1 | 1247.6123 | $[M+2Na]^{2+}$ | 52 | -  | ✓✓ |
| 37 | <br>m/z: 2489.2508 [MONO,perMe,Na,0,freeEnd]<br>HexNAc5Hex5Fuc1   | 1256.1200 | $[M+2Na]^{2+}$ | 27 | 27 | -  |
| 38 | <br>m/z: 2519.2613 [MONO,perMe,Na,0,freeEnd]<br>HexNAc5Hex6       | 1271.1253 | $[M+2Na]^{2+}$ | 72 | -  | -  |
| 39 | <br>m/z: 2530.2773 [MONO,perMe,Na,0,freeEnd]<br>HexNAc6Hex4Fuc1   | 1276.6333 | $[M+2Na]^{2+}$ | 27 | -  | -  |



|    |                                                                              |            |                       |    |    |    |
|----|------------------------------------------------------------------------------|------------|-----------------------|----|----|----|
| 40 | <p>m/z: 2564.2716 [MONO,perMe,Na,0,freeEnd]</p> <p>HexNAc3Hex6Fuc1NeuAc1</p> | 1293.6304* | [M+2Na] <sup>2+</sup> | 27 | -  | ✓✓ |
| 41 | <p>m/z: 2571.3039 [MONO,perMe,Na,0,freeEnd]</p> <p>HexNAc7Hex3Fuc1</p>       | 1297.1465  | [M+2Na] <sup>2+</sup> | 75 | -  | *  |
| 42 | <p>m/z: 2600.2815 [MONO,perMe,Na,0,freeEnd]</p> <p>HexNAc2Hex10</p>          | 1311.6353  | [M+2Na] <sup>2+</sup> | 52 | -  | ✓  |
| 43 | <p>m/z: 2601.3144 [MONO,perMe,Na,0,freeEnd]</p> <p>HexNAc7Hex4</p>           | 1312.1518  | [M+2Na] <sup>2+</sup> | 72 | -  | ✓  |
| 44 | <p>m/z: 2605.2981 [MONO,perMe,Na,0,freeEnd]</p> <p>HexNAc4Hex5Fuc1NeuAc1</p> | 1314.1437  | [M+2Na] <sup>2+</sup> | 44 | 58 | ✓✓ |

|    |                                                                                                                                                                |            |                |    |    |   |
|----|----------------------------------------------------------------------------------------------------------------------------------------------------------------|------------|----------------|----|----|---|
| 45 | 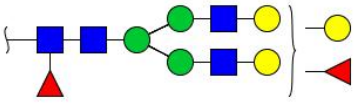 <p>m/z: 2622.3134 [MONO,perMe,Na,0,freeEnd]</p> <p>HexNAc4Hex6Fuc2</p>       | 1322.6513  | $[M+2Na]^{2+}$ | 27 | -  | - |
| 46 |  <p>m/z: 2635.3087 [MONO,perMe,Na,0,freeEnd]</p> <p>HexNAc4Hex5Fuc1NeuGc1</p> | 1329.149   | $[M+2Na]^{2+}$ | 27 | -  | - |
| 47 |  <p>m/z: 2646.3247 [MONO,perMe,Na,0,freeEnd]</p> <p>HexNAc5Hex4Fuc1NeuAc1</p> | 1334.6569* | $[M+2Na]^{2+}$ | 27 | -  | - |
| 48 |  <p>m/z: 2663.3400 [MONO,perMe,Na,0,freeEnd]</p> <p>HexNAc5Hex5Fuc2</p>     | 903.1061   | $[M+3Na]^{3+}$ | 27 | 27 | - |
| 49 |  <p>m/z: 2676.3352 [MONO,perMe,Na,0,freeEnd]</p> <p>HexNAc5Hex5NeuAc1</p>   | 907.4379*  | $[M+3Na]^{3+}$ | 35 | 35 | ✓ |

|    |                                                                                                                                                                  |           |                       |    |    |    |
|----|------------------------------------------------------------------------------------------------------------------------------------------------------------------|-----------|-----------------------|----|----|----|
| 50 | 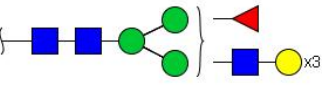 <p>m/z: 2693.3506 [MONO,perMe,Na,0,freeEnd]</p> <p>HexNAc5Hex6Fuc1</p>         | 913.1097  | [M+3Na] <sup>3+</sup> | 27 | -  | ✓  |
| 51 |  <p>m/z: 2764.3877 [MONO,perMe,Na,0,freeEnd]</p> <p>HexNAc6Hex6</p>             | 936.7887  | [M+3Na] <sup>3+</sup> | 72 | 35 | ✓  |
| 52 |  <p>m/z: 2792.3826 [MONO,perMe,Na,0,freeEnd]</p> <p>HexNAc4Hex5NeuAc2</p>      | 1407.6859 | [M+2Na] <sup>2+</sup> | 52 | 52 | ✓✓ |
| 53 |  <p>m/z: 2850.4244 [MONO,perMe,Na,0,freeEnd]</p> <p>HexNAc5Hex5Fuc1NeuAc1</p> | 965.4676  | [M+3Na] <sup>3+</sup> | 27 | 35 | ✓✓ |
| 54 |  <p>m/z: 2867.4398 [MONO,perMe,Na,0,freeEnd]</p> <p>HexNAc5Hex6Fuc2</p>       | 971.1394  | [M+3Na] <sup>3+</sup> | 27 | -  | -  |

|    |                                                                                                                                                                  |           |                 |    |    |    |
|----|------------------------------------------------------------------------------------------------------------------------------------------------------------------|-----------|-----------------|----|----|----|
| 55 | 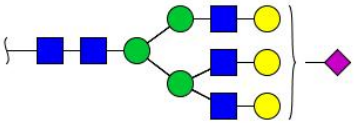 <p>m/z: 2880.4350 [MONO,perMe,Na,0,freeEnd]</p> <p>HexNAc5Hex6NeuAc1</p>       | 975.4711  | $[M+3Na]^{3+}$  | 72 | -  | ✓✓ |
| 56 |  <p>m/z: 2908.4663 [MONO,perMe,Na,0,freeEnd]</p> <p>HexNAc6Hex5Fuc2</p>         | 984.8149  | $[M+3Na]^{3+}$  | 27 | -  | ✓  |
| 57 |  <p>m/z: 2938.4769 [MONO,perMe,Na,0,freeEnd]</p> <p>HexNAc6Hex6Fuc1</p>        | 994.8184  | $[M+3Na]^{3+}$  | 27 | -  | ✓  |
| 58 |  <p>m/z: 2966.4718 [MONO,perMe,Na,0,freeEnd]</p> <p>HexNAc4Hex5Fuc1NeuAc2</p> | 1004.1501 | $[M+3Na]^{3+}$  | 27 | 58 | ✓✓ |
| 59 |  <p>m/z: 3026.4929 [MONO,perMe,Na,0,freeEnd]</p> <p>HexNAc4Hex5Fuc1NeuGc1</p> | 1532.728  | $[M+Na+K]^{2+}$ | 27 | -  | -  |
| 60 |  <p>m/z: 3037.5089 [MONO,perMe,Na,0,freeEnd]</p>                              | 1027.8291 | $[M+3Na]^{3+}$  | 52 | -  | -  |

|    |                                                                                                                                                          |            |                       |    |    |   |
|----|----------------------------------------------------------------------------------------------------------------------------------------------------------|------------|-----------------------|----|----|---|
|    | HexNAc5Hex5NeuAc2                                                                                                                                        |            |                       |    |    |   |
| 61 | 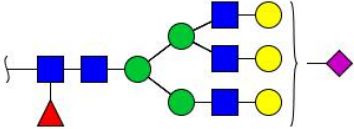<br>m/z: 3054.5242 [MONO,perMe,Na,0,freeEnd]<br>HexNAc5Hex6Fuc1NeuAc1   | 1033.5009* | [M+3Na] <sup>3+</sup> | 27 | -  | ✓ |
| 62 | <br>m/z: 3125.5613 [MONO,perMe,Na,0,freeEnd]<br>HexNAc6Hex6NeuAc1       | 1057.1799  | [M+3Na] <sup>3+</sup> | 72 | -  | - |
| 63 | <br>m/z: 3142.5766 [MONO,perMe,Na,0,freeEnd]<br>HexNAc6Hex7Fuc1       | 1062.8517  | [M+3Na] <sup>3+</sup> | 27 | -  | - |
| 64 | <br>m/z: 3211.5981 [MONO,perMe,Na,0,freeEnd]<br>HexNAc5Hex5Fuc1NeuAc2 | 1617.2937  | [M+2Na] <sup>2+</sup> | 27 | 64 | ✓ |
| 65 | <br>m/z: 3241.6087 [MONO,perMe,Na,0,freeEnd]<br>HexNAc5Hex5Fuc1NeuAc2 | 1095.8624  | [M+3Na] <sup>3+</sup> | 72 | 52 | - |

|    |                                                                                                                                                                |            |                |    |    |   |
|----|----------------------------------------------------------------------------------------------------------------------------------------------------------------|------------|----------------|----|----|---|
|    | HexNAc5Hex6NeuAc2                                                                                                                                              |            |                |    |    |   |
| 66 | 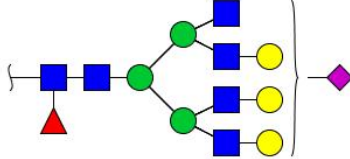 <p>m/z: 3299.6505 [MONO,perMe,Na,0,freeEnd]</p> <p>HexNAc6Hex6Fuc1NeuAc1</p> | 1115.2096  | $[M+3Na]^{3+}$ | 27 | -  | ✓ |
| 67 |  <p>m/z: 3316.6659 [MONO,perMe,Na,0,freeEnd]</p> <p>HexNAc6Hex7Fuc2</p>      | 1669.8275* | $[M+2Na]^{2+}$ | 27 | -  | ✓ |
| 68 |  <p>m/z: 3329.6611 [MONO,perMe,Na,0,freeEnd]</p> <p>HexNAc6Hex7NeuAc1</p>   | 1125.2132  | $[M+3Na]^{3+}$ | 80 | -  | - |
| 69 |  <p>m/z: 3415.6979 [MONO,perMe,Na,0,freeEnd]</p>                            | 1153.8921  | $[M+3Na]^{3+}$ | 27 | 52 | ✓ |

|    |                                                                                                                                                                  |            |                       |    |    |    |
|----|------------------------------------------------------------------------------------------------------------------------------------------------------------------|------------|-----------------------|----|----|----|
|    | HexNAc5Hex6Fuc1NeuAc2                                                                                                                                            |            |                       |    |    |    |
| 70 | 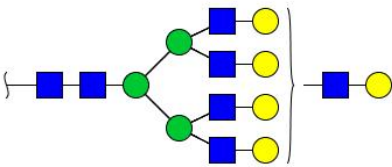 <p>m/z: 3417.7135 [MONO,perMe,Na,0,freeEnd]</p> <p>HexNAc7Hex8</p>             | 1154.5640* | [M+3Na] <sup>3+</sup> | 80 | -  | ✓  |
| 71 |  <p>m/z: 3486.7350 [MONO,perMe,Na,0,freeEnd]</p> <p>HexNAc6Hex6NeuAc2</p>       | 1177.5711* | [M+3Na] <sup>3+</sup> | 72 | -  | -  |
| 72 |  <p>m/z: 3602.7823 [MONO,perMe,Na,0,freeEnd]</p> <p>HexNAc5Hex6NeuAc3</p>     | 1216.2536  | [M+3Na] <sup>3+</sup> | 72 | 72 | ✓✓ |
| 73 |  <p>m/z: 3660.8242 [MONO,perMe,Na,0,freeEnd]</p> <p>HexNAc6Hex6Fuc1NeuAc2</p> | 1235.6009* | [M+3Na] <sup>3+</sup> | 27 | -  | -  |

|    |                                                                              |           |                       |    |    |    |
|----|------------------------------------------------------------------------------|-----------|-----------------------|----|----|----|
| 74 | <p>m/z: 3690.8348 [MONO,perMe,Na,0,freeEnd]</p> <p>HexNAc6Hex7NeuAc2</p>     | 1245.6044 | [M+3Na] <sup>3+</sup> | 80 | 52 | ✓  |
| 75 | <p>m/z: 3776.8716 [MONO,perMe,Na,0,freeEnd]</p> <p>HexNAc5Hex6Fuc1NeuAc3</p> | 1274.2833 | [M+3Na] <sup>3+</sup> | 27 | 75 | ✓✓ |
| 76 | <p>m/z: 3847.9087 [MONO,perMe,Na,0,freeEnd]</p> <p>HexNAc6Hex6NeuAc3</p>     | 1297.9624 | [M+3Na] <sup>3+</sup> | 72 | -  | -  |
| 77 | <p>m/z: 3866.9396 [MONO,perMe,Na,0,freeEnd]</p> <p>HexNAc8Hex9</p>           | 1944.9644 | [M+2Na] <sup>2+</sup> | 80 | -  | -  |



|    |                                                                                                                                                                  |           |                |    |    |    |
|----|------------------------------------------------------------------------------------------------------------------------------------------------------------------|-----------|----------------|----|----|----|
| 78 | 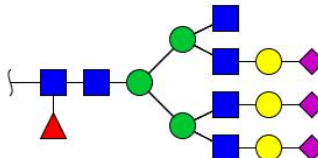 <p>m/z: 4021.9979 [MONO,perMe,Na,0,freeEnd]</p> <p>HexNAc6Hex6Fuc1NeuAc3</p>   | 1355.9921 | $[M+3Na]^{3+}$ | 27 | -  | -  |
| 79 |  <p>m/z: 4052.0084 [MONO,perMe,Na,0,freeEnd]</p> <p>HexNAc6Hex7NeuAc3</p>       | 1030.2440 | $[M+4Na]^{4+}$ | 80 | 52 | ✓  |
| 80 |  <p>m/z: 4413.1821 [MONO,perMe,Na,0,freeEnd]</p> <p>HexNAc6Hex7NeuAc4</p>      | 1120.5374 | $[M+4Na]^{4+}$ | 80 | 72 | ✓✓ |
| 81 |  <p>m/z: 4587.2713 [MONO,perMe,Na,0,freeEnd]</p> <p>HexNAc6Hex7Fuc1NeuAc4</p> | 1164.0597 | $[M+4Na]^{4+}$ | 80 | 75 | ✓  |

|    |                                                                                                                                                                 |            |                       |    |   |   |
|----|-----------------------------------------------------------------------------------------------------------------------------------------------------------------|------------|-----------------------|----|---|---|
| 82 | 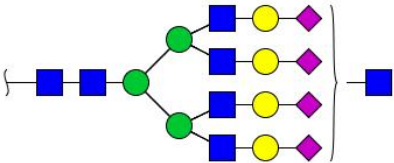 <p>m/z: 4658.3084 [MONO,perMe,Na,0,freeEnd]</p> <p>HexNAc7Hex7NeuAc4</p>      | 1181.8190* | [M+4Na] <sup>4+</sup> | 80 | - | - |
| 83 |  <p>m/z: 4707.3136 [MONO,perMe,Na,0,freeEnd]</p> <p>HexNAc6Hex7Fuc1NeuGc4</p>  | 1194.0703* | [M+4Na] <sup>4+</sup> | 80 | - | - |
| 84 |  <p>m/z: 4761.3605 [MONO,perMe,Na,0,freeEnd]</p> <p>HexNAc6Hex7Fuc2NeuAc4</p> | 1207.5820* | [M+4Na] <sup>4+</sup> | 80 | - | - |
| 85 |  <p>m/z: 4862.4082 [MONO,perMe,Na,0,freeEnd]</p> <p>HexNAc7Hex8NeuAc4</p>    | 1232.8439* | [M+4Na] <sup>4+</sup> | 80 | - | * |

|    |                                                                                                                                                                  |            |                       |    |   |    |
|----|------------------------------------------------------------------------------------------------------------------------------------------------------------------|------------|-----------------------|----|---|----|
| 86 | 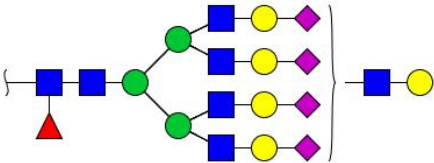 <p>m/z: 5036.4974 [MONO,perMe,Na,0,freeEnd]</p> <p>HexNAc7Hex8Fuc1NeuAc4</p>   | 1276.3663* | [M+4Na] <sup>4+</sup> | 80 | - | ✓  |
| 87 |  <p>m/z: 2010.0141 [MONO,perMe,Na,0,freeEnd]</p> <p>HexNAc4Hex3Fuc2</p>         | 1016.5017  | [M+2Na] <sup>2+</sup> | 13 | - | ✓✓ |
| 88 |  <p>m/z: 2366.1711 [MONO,perMe,Na,0,freeEnd]</p> <p>HexNAc2Hex8Fuc1</p>        | 1194.5802  | [M+2Na] <sup>2+</sup> | 52 | - | -  |
| 89 |  <p>m/z: 3153.5926 [MONO,perMe,Na,0,freeEnd]</p> <p>HexNAc7Hex5Fuc2</p>       | 1066.5237  | [M+3Na] <sup>3+</sup> | 80 | - | -  |
| 90 |  <p>m/z: 4314.1501 [MONO,perMe,Na,0,freeEnd]</p> <p>HexNAc7Hex8Fuc1NeuAc2</p> | 1453.3762  | [M+3Na] <sup>3+</sup> | 90 | - | -  |

<sup>a</sup> MALDI MS based quantification was performed using masses corresponding to the [M+Na]<sup>+</sup> adducts only;

<sup>b</sup> Quantification of N-glycans isolated from tissues were performed using the heavy glycan of the same composition;

<sup>c</sup> one check indicates that permethylated structure was confirmed while double check indicates that both structures (permethylated and perdeuterated) were confirmed, while asterisk indicate that only perdeuterated structure was confirmed.

Legend: ■ N-acetyl glucosamine (GlcNAc), ● Mannose (Man), ● Galactose (Gal), ▲ Fucose (Fuc), ◆ Sialic acid (NeuAc).
