# Supplementary material for: Identification of Differential N-Glycan Compositions in the Serum and Tissue of Colon Cancer Patients by Mass Spectrometry
Source: MDPI journal article supplement (doi:10.3390/biology10040343), 2021-04-20
Supplement: s1 [file s1]

# Identification of differential N-glycans in the serum and tissue of colon cancer patients by mass spectrometry

Marcelo de Melo Andrade Coura<sup>1,2\*</sup>, Eder Alves Barbosa<sup>2,3</sup>, Guilherme Dotto Brand<sup>3</sup>, Carlos Bloch Jr<sup>2</sup>, and Joao Batista de Sousa<sup>1</sup>

<sup>1</sup>Division of Colorectal Surgery, University Hospital of Brasilia, School of Medicine, University of Brasilia, Brasilia-DF, Brazil

<sup>2</sup>Laboratory of Mass Spectrometry, EMBRAPA Genetic Resources and Biotechnology, Brasilia-DF, Brazil

<sup>3</sup>Laboratory for the Synthesis and Analysis of Biomolecules, Institute of Chemistry, University of Brasilia, Brasilia-DF, Brazil

## Supplemental material 5

### SERUM

**Table S3. N-glycosylation modifications in serum of CRC patients**

| Method                              | Aiming                                                                    | Finding                                                                                          | Composition                                                                                                                                                                       | Reference               |
|-------------------------------------|---------------------------------------------------------------------------|--------------------------------------------------------------------------------------------------|-----------------------------------------------------------------------------------------------------------------------------------------------------------------------------------|-------------------------|
| Lectin blot                         | Total serum N-glycans, immunodepleted plasma, CRC patients vs controls    | Increase of sialylation and fucosylation                                                         | ↑                                                                                             | Qiu et al, 2008         |
| <i>Aleuria aurantia</i> lectin blot | β-haptoglobin N-glycosylation, CRC patients, Chron's disease and controls | Higher AAL affinity in haptoglobin from CRC patients                                             | ↑                                                                                             | Park et al, 2010        |
| Lectin blot                         | Total serum N-glycans, CRC patients vs controls                           | Decrease of core fucosylation                                                                    | ↓                                                                                             | Zhao et al, 2011        |
| Liquid chromatography (UPLC)        | IgG N-glycosylation, CRC patients vs controls                             | Decrease of galactosylation and sialylation, increase of core fucosylation                       | ↓ <br>↑  | Vučković et al, 2016    |
| Liquid chromatography (UPLC)        | IgG N-glycosylation, Prognostic in CRC patients                           | Higher mortality with decrease of galactosylation and sialylation<br>Increase of bisecting forms | ↓ <br>↑  | Theodoratou et al, 2016 |

|                               |                                                   |                                                                                                                                              |                                                                                                                                                                                                                                                                                                                                                                                  |                       |
|-------------------------------|---------------------------------------------------|----------------------------------------------------------------------------------------------------------------------------------------------|----------------------------------------------------------------------------------------------------------------------------------------------------------------------------------------------------------------------------------------------------------------------------------------------------------------------------------------------------------------------------------|-----------------------|
| MALDI-TOF/MS, electrophoresis | Total serum N-glycans, CRC patients vs controls   | Increase of multi-antennae core- and outer-arm fucosylated                                                                                   | 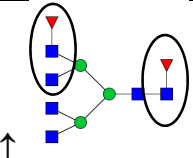<br>↑                                                                                                                                                                                                                                                                                          | Snyder et al, 2016    |
| Liquid chromatography (UPLC)  | Total serum N-glycans, CRC patients vs controls   | Decreased of core-fucosylated di-antennary asialo and monosialo,<br><br>Increase of multi-antennae sialylated                                | ↓<br><br>↑<br>                                                                                                                                                                                               | Doherty et al, 2018   |
| MALDI-TOF/MS                  | Total serum N-glycans, prognostic in CRC patients | Decrease of core-fucosylated di-antennary<br><br>Increase of multi-antennae sialylated, sialyl Lewis                                         | ↓<br><br>↑<br><br>↑<br>                                                                                                 | de Vroome et al, 2018 |
| MALDI-TOF/MS, LC/MS           | Total serum N-glycans, CRC patients vs controls   | Increase of mannose -rich, bianntenary core fucosylated di-sialo and multi-antennae sialylated forms<br><br>decrease of galactosylated forms | ↑<br><br>↑<br><br>↑<br><br>↓<br> | present study, 2021   |

## TISSUE

**Table S4. N-glycosylation modifications in cell lines and tissues of CRC**

| Method                                         | Aiming                                                                            | Finding                                                                                                                                                                          | Compositions                                                                                                 | Reference            |
|------------------------------------------------|-----------------------------------------------------------------------------------|----------------------------------------------------------------------------------------------------------------------------------------------------------------------------------|--------------------------------------------------------------------------------------------------------------|----------------------|
| CRC tissues/Lectin                             | N-glycosylation profile in MUC1/CEACAM 5 glycoproteins                            | Increase of sialylated, high-mannose and branched N-glycans in CEACAM 5                                                                                                          | 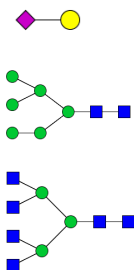                           | Saeland et al, 2012  |
| CRC tissues/MALDI-TOF/MS, HILIC CHROMATOGRAPHY | Comparison between CRC tumour and paired normal tissues                           | Increase of high-mannose, sulfated, paucimannosidic and sLewis X(sLe <sup>x</sup> ), decrease of bisecting compositions in tumour                                                |  <p>β4</p>                | Balog et al, 2012    |
| CRC tissues/Lectin blot                        | Comparison between CRC tumour and paired normal tissues                           | Increase of α2,3 sialylated residues                                                                                                                                             |  <p>α2,3</p>             | Fukasawa et al, 2013 |
| CRC tissues and cell lines/LC-MS               | Comparison between CRC tumour and cell lines (SW1116, SW480, SW620, SW837, LS174) | Increase of high-mannose in tumour and cell lines                                                                                                                                |                          | Chik et al, 2014     |
| Cell lines/MS                                  | N-glycans analysis of three cell lines (LIM 1215, LIM 1819 and LIM2405)           | Increase of high-mannose and α2,6-sialylated N-glycans in all cell lines. Increase of bisecting compositions in LIM 1215 and increase of α2,3 sialylated compositions in LIM2405 |  <p>α2,6</p> <p>α2,3</p> | Sethi et al, 2014    |

|                          |                                                                                                 |                                                                                                                                                                                                             |                                                                                                                                                   |                    |
|--------------------------|-------------------------------------------------------------------------------------------------|-------------------------------------------------------------------------------------------------------------------------------------------------------------------------------------------------------------|---------------------------------------------------------------------------------------------------------------------------------------------------|--------------------|
| CRC tissues/MALDI-TOF/MS | Comparison of N-glycans among tumour tissue, adenoma and paired normal tissue of rectal tumours | Increase of small mannose, paucimannosidic and sialylated compositions in CRC tissue in relation to adenoma. Worst prognosis in tumours with increased paucimannosidic                                      | 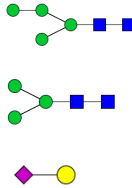                                                                | Kaprio et al, 2015 |
| CRC tissues/             | Comparison between N-glycans in EGFR + and EGFR -tumour tissues with paired normal tissues      | <p>Increase of high-mannose, paucimannosidic, hybrid compositions and higher <math>\alpha 2,6</math>-sialylation.</p> <p>High bisecting and low <math>\alpha 2,3</math> sialylation in EGFR +</p>           |  <p><math>\alpha 2,6</math></p> <p><math>\alpha 2,3</math></p> | Sethi et al, 2015  |
| CRC tissues/Lectin array | N-glycan profile in CEA of tumour tissues compared no paired normal tissues                     | Increase of fucose and mannose residues, decrease of branched and bisecting compositions in tumours. Decrease of mannose, galactose, N-Acetylglucosamine and N-Acetylgalactosamine in more advanced disease |                                                               | Zhao et al, 2018   |
| CRC tissues/LC-MS        | Comparison between N-glycosylation profile in tumour and paired normal tissues                  | Increase of high-mannose and bi-fucosylated and decrease of                                                                                                                                                 |                                                               | Zhang et al, 2019  |

|                               |                                                                                                            |                                                                                                                                                                   |                                                                                                                                                                                                                                                                                                                                                                                                                                                                                                                      |                     |
|-------------------------------|------------------------------------------------------------------------------------------------------------|-------------------------------------------------------------------------------------------------------------------------------------------------------------------|----------------------------------------------------------------------------------------------------------------------------------------------------------------------------------------------------------------------------------------------------------------------------------------------------------------------------------------------------------------------------------------------------------------------------------------------------------------------------------------------------------------------|---------------------|
|                               |                                                                                                            | bisecting compositions in tumour. Decrease of bisecting compositions in more advanced disease                                                                     | 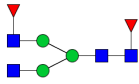<br>                                                                                                                                                                                                                                                                                                                                             |                     |
| CRC tissues/MALDI-TOF/MS      | N-glycans profile in right- and left- sided tumour tissues and normal colon tissues of healthy individuals | Increase of acidic, paucimannosidic, high mannose N-glycans and decrease of bisecting compositions in tumour samples. No difference related to stage or sidedness |  <br>    | Holm et al, 2020    |
| CRC tissue/MALDI imaging      | Samples of stage II CRC tissue and peritumoral tissue                                                      | <p>Increase of high mannose N- and sialylation</p> <p>Decrease of fucosylation and branched N-glycans</p>                                                         |  <br>                                                                                                                                                                 | Boyaval et al, 2020 |
| CRC tissue/MALDI-TOF/MS LC/MS | Comparison between N-glycosylation profile in tumour and paired normal tissues                             | Increase of high mannose, paucimannosidic, bi-antennary mono-galctosylated and branched N-glycans                                                                 |                                                                                                                                                                      | Present study, 2021 |
