# Supplementary material for: Identification of Differential N-Glycan Compositions in the Serum and Tissue of Colon Cancer Patients by Mass Spectrometry
Source: Biology (Basel). 2021 Apr 20;10(4):343. doi: 10.3390/biology10040343 (PMC8074232; doi:10.3390/biology10040343)
Supplement: Supplementary file 1 [file biology-10-00343-s001.zip]

Archive with 4 entries (4 files):
- Supp4_Figures_S1-S17.pdf
- Suppl Material 3_Raw data_Serum_Tissue.xlsx
- Suppl_material_5_Tables S4_S5.pdf
- Supp_Material1_Tables S1_S2.pdf
