# Supplementary material for: Identification of Differential N-Glycan Compositions in the Serum and Tissue of Colon Cancer Patients by Mass Spectrometry
Source: Biology (Basel). 2021 Apr 20;10(4):343. doi: 10.3390/biology10040343 (PMC8074232; doi:10.3390/biology10040343)
Supplement: Supplementary file 1 [file biology-10-00343-s001.zip › Suppl Material 3_Raw data_Serum_Tissue.xlsx]

## Sheet: Raw data serum MALDI
List of -CH3/-CD3 ratios from all 28 ion signals detected in serum of cancer patients (n=13) and controls (n=11) by MALDI/MS
									CH3/CD3 RATIO
Sample name	Group	Glycan 6	Glycan 10	Glycan 13	Glycan 14	Glycan 17	Glycan 19	Glycan 20	Glycan 24	Glycan 25	Glycan 26	Glycan 27	Glycan 28	Glycan 32	Glycan 33	Glycan 35	Glycan 44	Glycan 49	Glycan 51	Glycan 53	Glycan 58	Glycan 64	Glycan 69	Glycan 72	Glycan 74	Glycan 75	Glycan 79	Glycan 80	Glycan 81
C1	Control	4.04969	3.03727	3.29037	0.0413234	1.01242	2.9133	0	0	0	0	1.3499	1.01242	0	0	1.01242	0.704294	0	0.447349	0.188358	0.418174	0	0	0.586139	0.000517598	0.41688	0.0010352	0.0106571	0.119109
C2	Control	0.152622	0.156345	0.0761487	0.00187024	0.0372249	0.0624372	0.00937516	0.0145268	0.0297799	0.00653706	0.056251	0.0389846	0.0108951	0.0595599	0.477932	0.75262	0.00290536	0.0806237	0.0544755	1.39153	0.297799	0.00181708	3.23112	0.00141329	0.280782	0.00121139	0.0670048	0.00850855
C3	Control	2.14346	2.14346	0.881801	0	0	0.515805	0	0.0573116	0	0	0.824406	0	0	0	0.401182	0.321518	0	0.573116	0.114623	0.535864	0	0	0.198468	0.0052356	0.918624	0.0052356	0.066156	0
C4	Control	0.590775	0.590775	0.553888	0	0	0.633183	0	0	0.295388	0	0.273475	0.233003	0.0120171	0.39385	0.588837	0.252188	0	0.222316	0.144205	0.608728	0.257285	0.00194878	0.710028	0.00306236	0.506638	0.00389755	0.018726	0.031274
C5	Control	3.65858	1.21953	0.424183	0.024149	1.21953	0.362235	0.135503	0.0473602	3.65858	0.0315735	0.609763	0	0	0	0.268375	0.103423	0	0.236801	0.0947205	0.189608	0.385113	0	0.373612	0.00225734	0.418978	0.00225734	0.0281971	0.0897811
C6	Control	8.5152	5.6768	0.781088	0	2.8384	0.603568	0	0.260598	0	0	0	0	0	0	0.781793	0.700139	0	0	0.173732	0.700139	0	0	0.477911	0.0138889	1.25025	0.0208333	0.238955	1.25025
C7	Control	0.391961	0.587941	0.447411	0.024443	0	1.0266	0.114322	0.0147512	0.326634	0.0110634	1.61956	1.68164	0.0295024	0	0.376156	0.449484	0	0.324526	0.158575	0.847464	0.527639	0.00235356	0.943609	0.00183054	1.32373	0.00130753	0.0314536	0.0601694
C8	Control	0.463486	0.463486	0.741577	0.0662123	0.115871	1.65531	0.231743	0.0579357	0	0	2.08569	0.463486	0	0	1.91188	0.589891	0	1.30355	0.347614	0.969107	0.154495	0.00097371	0.95594	0.00146057	0.0993184	0.00097371	0.0289679	0.0331061
C9	Control	0.0378533	0.0336474	0.198099	0.00504711	0.00757066	0.168237	0	0.00240338	0.00504711	0.000721015	0	0.0185061	0.00384541	0.0176649	0.04975	0.0672948	0	0.0146606	0.00672948	0.0740242	0.00616869	0.00134589	0.0790713	0.00201884	0.013459	0.000672948	0.00336474	0.00252355
C10	Control	1.76742	1.5991	1.1695	0.0468908	0.210408	1.07849	0.247	0.0291334	0.210408	0.0339889	1.59178	1.0821	0.0194222	0.378734	1.3547	1.15724	0.0145667	0.155378	0.165089	0.784246	0.437	0.00119474	0.878918	0.00119474	0.797334	0.000796495	0.0239705	0.0664445
C11	Control	1.55122	1.99443	2.07753	0.083101	0.443206	3.93345	0.221603	0	1.32962	0	1.66202	0	0.221603	0.886411	3.95719	0.653145	0.12663	2.27934	1.32962	1.95944	0.506521	0.00243902	0.499243	0.0010453	1.27747	0.00209059	0.0254716	0.0391064
CRC1	CRC	0.88045	0.756637	0.594297	0.0123059	0.192599	0.423014	0.108018	0.0162932	0.220113	0	0.627856	0.421271	0.0672097	0.288898	1.0448	0.586158	0.0224032	0.727086	0.0672097	1.30575	0.344308	0.00293747	0.898468	0.00146874	1.81024	0.0010491	0.0282241	0.100569
CRC2	CRC	1.19547	0.902698	0.425032	0.0395146	0.365959	0.465943	0.0917213	0.0185794	0.195178	0.0144507	0.341407	0.353118	0.0454164	0.219575	0.646152	0.430181	0.0165151	0.763822	0.121799	0.73407	0.257635	0.00251597	1.12447	0.00135475	2.10862	0.00232243	0.0670924	0.191693
CRC3	CRC	0.470053	0.495461	0.561805	0.0195783	0.101633	0.66044	0.0816694	0.0188468	0.177858	0.0188468	0.631576	0.69419	0.0314113	0.152449	1.13499	0.519374	0.0167527	0.383218	0.144492	1.08732	0.285843	0.00262939	0.625618	0.000553557	3.92557	0.00138389	0.014382	0.0762247
CRC4	CRC	1.47845	1.62387	0.827938	0.0255059	0.327197	0.73034	0.0937158	0.0150885	0.399908	0.0111178	0.707716	1.53177	0.0262063	0.436263	0.905308	0.785019	0.0309711	0.31527	0.545567	0.76326	0.794723	0.00310062	1.26965	0.00260052	0.710705	0.00440088	0.102191	0.068337
CRC5	CRC	1.70786	2.78754	1.34073	0.02501	0.588917	0.773224	0.127988	0.0401863	0.942267	0.0163722	0.812723	0.905777	0.0714424	0.628178	0.896006	0.902149	0.0223257	0.634051	0.291723	0.838739	0.488004	0.00304183	0.392789	0.00095057	2.56298	0.00152091	0.0131661	0.0555157
CRC6	CRC	0.539863	1.1118	0.638046	0.0189565	0.240533	0.747531	0.107496	0.0139877	0.304675	0.00952354	0.829252	0.379508	0.0330348	0.753671	1.11991	0.46417	0.0244041	0.535104	0.218446	1.02876	0.616175	0.0034132	1.54903	0.00433477	0.817944	0.00443716	0.0647885	0.0266821
CRC7	CRC	0.686468	0.91529	0.228454	0.0219336	0.228823	0.315844	0.0596879	0.010404	0.330521	0	0.426998	0.225998	0	0.330521	0.570485	0.385426	0	0.24276	0.0936358	0.782299	0.315345	0	0.944974	0.00112511	0.400127	0.00090009	0.0281033	0
CRC8	CRC	0.994119	0.441831	0.0838547	0	0	0.101223	0	0	0	0	0.181443	0.201798	0.0206881	0	0.310322	0.161195	0.0206881	0.165505	0.124129	0.445657	0.212228	0.00488827	1.16178	0.00488827	0.879803	0.00558659	0.0749534	0.0549877
CRC9	CRC	0.271471	0.452451	1.65941	0.0218634	0	0.470064	0.070057	0.0119767	0	0.00798444	0.192657	0.316716	0.0199611	0.361961	0.427167	0.307326	0.0199611	0.335346	0.135735	1.2293	0.457214	0.00329056	1.58056	0.00230339	6.74799	0.00263245	0.0422288	0.271471
CRC10	CRC	1.05274	0.701826	5.09767	0.0540715	0	0.880592	0.172378	0	0	0	1.50831	1.72857	0	0.467884	0.538387	0.678431	0.056082	0.415006	0.257977	1.68438	2.90301	0.00338066	1.12384	0.0020284	3.47989	0.00338066	0.0321097	0.409398
CRC11	CRC	0.604698	1.25039	0.210192	0.0248907	0.215232	0.463407	0.0937063	0.0152545	0.215232	0.0101697	1.09064	0.485399	0.0584756	0.338221	1.1835	0.964994	0.0216106	1.06654	0.127121	1.24566	0.147587	0.00107826	1.37566	0.000988409	3.46713	0.000539132	0.0409965	0.0937063
CRC12	CRC	0.403089	0.38816	0.0929913	0.0870871	0.164221	0.265616	0.606126	0.0487688	0.209009	0.0627027	0.543423	1.31676	0.0696697	0.164221	0.633994	0.684029	0.0696697	0.397117	0.0836036	1.11155	0.506445	0	1.50156	0.0046332	1.75568	0	0	0
CRC13	CRC	0.92052	0.709049	0.176575	0.0293164	0.0870762	0.457787	0.0934845	0.0341692	0.199031	0.0292879	0.84136	0.359915	0.0488131	0.124395	0.810297	0.696264	0.0244065	0.70779	0.0927449	0.42847	0.148317	0	2.50655	0.00224635	0.42068	0.00187196	0.128541	0

## Sheet: Raw data Serum LCMSMS
List of -CH3/-CD3 ratios from all 52 ion signals identified in serum of cancer patients (n=13) and controls (n=11) by LC-MS/MS
							CH3/CD3 RATIO
Sample name		Group	Glycan 5	Glycan 6	Glycan 8	Glycan 9	Glycan 10	Glycan 13	Glycan 14	Glycan 16	Glycan 17	Glycan 19	Glycan 20	Glycan 22	Glycan 23	Glycan 24	Glycan 25	Glycan 26	Glycan 27	Glycan 28	Glycan 31	Glycan 32	Glycan 33	Glycan 34	Glycan 35	Glycan 36	Glycan 40	Glycan 41	Glycan 42	Glycan 43	Glycan 44	Glycan 49	Glycan 50	Glycan 51	Glycan 53	Glycan 55	Glycan 56	Glycan 57	Glycan 58	Glycan 61	Glycan 64	Glycan 66	Glycan 67	Glycan 69	Glycan 70	Glycan 72	Glycan 74	Glycan 75	Glycan 79
C1		Control	0.0268334	0.138816	0.139968	0.0196844	0.039244	1.29313	0.536158	1.27597	0.000102864	0.858006	0.0381798	0.795803	0.36465	0.0256638	0.10239	0.497102	0.562241	0.405379	1.42318	0.0796596	0.280499	1.01019	0.866589	0.443706	0.100605	0.736807	0.087178	2.70463	0.732926	0.0105273	0.0312161	9.108	0.063494	0.849973	0.048079	0.246531	0.0451003	0.0653315	0.348526	0.181374	0.0738489	0.161692	0.0831729	0.810978	6.02995	0.135943	0.00140652
C2		Control	0.495297	0.463084	0.276212	0.0603358	1.31867	2.71512	0.70029	0.000415003	0	0.0361864	0.64246	1.15432	0.0520143	0.16974	3.2823	3.32734	0.467896	1.0182	0.116117	0.482239	1.37793	1.8538	1.0087	5.85103	1.11741	0.175973	1.33074	9.39116	4.49424	0.870234	6.02771	0.924704	0	0.111298	1.99811	0.438806	0.712736	0.105676	0.148409	0.148313	0	0.0072932	0.0241316	0.311324	0.407029	0.155569	0
C3		Control	2.11386	0.434739	2.20971	0	0.00931614	3.03803	1.24672	4.20549	0.000957253	2.33468	0.0572007	2.10267	1.46734	0.0987218	0.222988	2.95943	5.96374	0.558842	9.68085	0.120158	0.319911	0.870466	0.752323	0.936759	1.54601	5.51844	0.226594	4.17218	2.35077	0.0518826	0.569188	9.94317	1.31183	1.05502	0.559873	1.08837	0.777482	1.88144	3.92974	1.00522	0.656059	1.0079	0.0625838	0.360325	17.9014	1.21124	0
C4		Control	0.00745877	0.168327	0.0109455	0	0.00704794	0.696499	0.216668	0.945118	0.000797468	0.660033	0.0900469	0.668633	0.407242	0	0.149278	1.04081	0	0.30341	4.22776	0.0783517	0.383484	0.538626	0.376007	1.0656	0.229175	1.91843	0.131534	5.44473	2.25271	0.0246037	0	23.0025	0.327631	1.40341	0.296043	0.506477	0.415578	0.365732	0.848952	0.733989	0.098057	0.543268	0.199258	1.74803	27.9038	0.515971	0.00157991
C5		Control	0.410927	0.289759	1.05604	0.123035	0.0755046	3.4709	1.12622	6.22511	0.000363746	2.11455	0.0551158	1.71277	1.34231	0.0910954	0.149671	1.67973	3.81943	0.729647	16.3474	0.0987638	0.343271	1.23973	0.747351	0.851007	0.732315	1.62062	0.123626	2.65292	0.98133	0.0123964	0.0709058	9.60841	0.645152	0.541635	0.366385	0.281588	0.508409	0.741938	1.99135	0.766817	0.51751	0.538254	0.00947943	0.853279	4.93765	0.626471	0.00105633
C6		Control	0.143038	0.307617	0.242494	0.10587	0.00639944	1.03543	0.446997	2.82238	0.000933369	0.907189	0.108027	0.478249	0.989258	0	0.1386	1.02592	0	0.300974	3.34888	0.0600934	0.267902	0.531748	0.271191	0.899204	0.711221	4.18177	0.279146	7.63458	1.32014	0.0532818	0.194138	4.53369	0.46024	2.42442	0.380925	0.241229	0	0.776912	1.28925	0.836418	0.435094	1.41042	0.218487	0.934121	148.889	0.776621	1.79301
C7		Control	0.00351898	0.0775326	0.00964019	0.00841067	0.0532409	0.148666	0.0336965	0.953273	0.000436868	0.190917	0.00470057	0.0809735	0.0450884	0.021576	0.0963904	0.312421	0.334056	0.0265186	0.483411	0.037574	0.191687	0.424407	0.824009	0.301788	0.0389225	0.245984	0.0623203	0.46437	1.33785	0.0160098	0.0333464	2.30426	0.060139	0.110339	0.052248	0.078601	0.0562012	0.0517857	0.135071	0.0622513	0.0159408	0.0361552	0.00267701	0.213593	0.201379	0.0354573	0.000243216
C8		Control	0.034981	0.0544006	0.0694458	0.149619	0.0104888	1.09874	0.0161306	0.827985	0.000431121	0.92914	0.0101631	0.665233	0.784809	0.0269406	0.0623345	1.64459	1.65994	0.182051	2.63238	0.015787	0.146884	1.08736	0.69552	0.175476	0.389823	1.53261	0.0315907	1.65303	1.03328	0.0118462	0.0838519	7.07502	0.187031	0.415671	0.154651	0.0631353	0.142287	0.335383	1.06498	0.60079	0.0695705	0.651979	0.0464545	1.1589	11.4047	0.33701	0.00248364
C9		Control	0.192739	0.262684	0.228676	0.0632591	0.0140595	2.46631	0.685499	11.8288	0.000363795	1.18256	0	1.30044	0.734967	0.0495498	0.165969	2.19212	2.56582	0.320334	9.25664	0.0725657	0.372622	0.722771	1.06534	0.815764	0.371565	1.99723	0.147464	2.05724	3.68135	0.0139255	0	9.14437	0.34356	0.649835	0.221323	1.14187	0.315254	0.41376	1.2581	0.743645	0.0965743	0.2716	0.0291647	0.684892	2.57749	0.364932	0.000558366
C10		Control	0.0354223	0.274532	0.105566	0.0144126	0	1.44835	1.06652	2.50958	0.000159563	1.39088	0	1.7103	0.364106	0.043035	0.155674	1.61871	2.78557	0.312756	6.59334	0.0845856	0.392339	1.359	1.29195	0.803335	0.413145	1.41025	0.15842	1.57657	6.19507	0.00525296	0.375368	10.327	0.473561	0.332658	0.177229	1.40887	0.185805	0.60736	1.48173	0.283441	0.181227	0	0.0154815	0.695717	1.05755	0.390263	0
C11		Control	0.0346139	0.221354	0.0342257	0.0453462	0.0136585	1.80825	0.907456	1.97396	0.000225558	0.935127	0.0843448	0.881804	0.465829	0.0397236	0.137838	1.14071	2.59051	0.291215	6.93825	0.0916148	0.333849	0.328706	0.380409	0.837738	0.462096	1.12635	0.218576	4.03888	1.65901	0.000677746	0.257954	10.075	1.76207	1.52207	0.150406	1.45714	0.522354	0.926034	2.38451	0.633117	0.423531	1.06768	0.0784487	0.740976	28.6274	0.511774	0
CRC1		CRC	0.0125472	0.157094	0.0226653	0.0204896	0.106337	0.227004	0.0393053	1.82755	0.0261326	0.29761	0.0356165	0.020349	0.00218272	0.0210614	0.03898	0.105682	0.692329	0.0690383	0.0135759	0.0221196	0.0718631	0.608418	0.525729	0.0297079	0.00466345	0.0917505	0.00395438	0.0216523	0.746346	0.0122818	0.0374288	1.03221	0.13215	0.122906	0.00437992	0.0156639	0.497807	0.0346426	0.138283	0.0263192	0.00565971	0.0461245	0.0206179	0.983511	0.168554	0.452223	0.0349037
CRC2		CRC	0.000727847	0.0765453	0.00691962	0.031381	0.07882	0.246641	0.0176077	2.41821	0.0169153	0.344454	0.00915219	0.0064534	0.00538722	0.00860158	0.0342971	0.116856	0.393283	0.0450295	0.0603556	0.0416899	0.0322395	0.745907	0.594089	0.0324069	0.065109	0.203794	0.0057646	0.0712422	0.479158	0.0218625	0.131718	0.572478	0.350842	0.131113	0.0197248	0.0180968	1.21421	0.0536254	0.331573	0.0523711	0.00822182	0.0750312	0.225507	1.47819	0.944169	0.628633	0.570373
CRC3		CRC	0.0216099	0.145004	0.0124118	0.0441648	0.0937317	0.542381	0.0191728	0.227532	0.0267498	0.428862	0.0153755	0.0265247	0.00610435	0.0225017	0.0423459	0.159866	0.590353	0.0805045	0	0	0.0662064	0.820295	0.763169	0.0246208	0	0	0.00484145	0.00591878	0.769905	0.0197742	0.018878	1.05694	0.312083	0.14797	0.00448624	0.0584593	1.37973	0.0821687	0.254483	0.0508481	0.00580757	0.12494	0.701255	1.03915	1.14826	0.796605	0.278886
CRC4		CRC	0.387554	0.0565308	0.00695427	0.26395	0.101841	0	0.0657108	0.0850733	0.271713	0.0408937	0.228127	0.018298	0.053021	0.112615	0.912243	1.69327	0.292996	0.0933776	0.0408975	0.0772437	2.26473	2.00472	0.0427802	0.223915	0	0.00571493	0	2.62003	0.321533	0.0274657	2.61451	3.37852	0	0.00956801	0.0269669	3.51876	0.145764	0.0693668	0.574867	0.0230411	0	0.406979	0.00133411	0.127723	2.80398	0.216516	5.72845
CRC5		CRC	0.0107798	0.132699	0.00589847	0.0285922	0.00696227	0.499759	0.0234461	0.0300303	0.0227001	0.437961	0.0207203	0.0164074	0.00264733	0.0219907	0.0308091	0.211684	0.519994	0.0927778	0.0136343	0.0377911	0.0562846	0.638188	0.606107	0.0227529	0.0180935	0	0.00462865	0	0.71864	0.011061	0.0220518	0.605597	0.283753	0.134202	0.00289074	0.0362162	1.06673	0.0747131	0.209512	0.0397714	0.0026652	0.10232	0.0790076	0.741319	0.359059	0.982895	0.086672
CRC6		CRC	0.0281082	0.225703	0.0291621	1.92404e-05	0.131933	0.67592	0.0382071	0.439775	0.0372556	0.651972	0.0322425	0.0386163	0	0.0244978	0.0582937	0.261156	0.664899	0.192045	0.0255019	0.0469809	0.0898978	0.53082	0.73238	0.0345916	0	0.093144	0.00770678	0.0177259	0.942046	0.0306057	0.0173226	0.615452	0.533484	0.078506	0.00284053	0.0109075	0.875185	0.100576	0.407757	0.0494353	0.0062057	0.0539132	0.124255	0.679322	1.29941	0.372707	0.377939
CRC7		CRC	0.12008	0.293413	0.0802435	0	0.158655	1.05222	0.00583139	1.39829	0.0617176	0.772153	0.0230403	0.0531284	0.00431431	0.0488221	0.102956	0.326163	0.927479	0.202103	0.0206423	0.0282167	0.110504	1.50193	0.752595	0.041592	0.000456291	0.188558	0.0133217	0.0147326	1.14363	0.0255163	0.0441656	0.841516	0.580186	0.0737503	0.00343844	0.0346203	1.23567	0.0974634	0.415249	0.0327346	0.00802438	0.122427	0.612229	0.72519	1.24755	1.38223	0.0988285
CRC8		CRC	0.0244164	0.182223	0.0255239	9.31508e-05	0.0780294	0.394388	0.0344171	0.0813795	0.01515	0.419166	0.0165044	0.032282	0.00382661	0.0186471	0.0507292	0.117648	0.535529	0.0712839	0	0.0153017	0.0784391	0.707145	0.648851	0.0432356	0.000125351	0	0.00836743	0.0138987	0.77228	0.0113122	0.0103589	0.848778	0.354729	0.125891	0.00251842	0.0296352	0.812139	0.060481	0.486925	0.0501744	0.0113614	0.0605683	0.0860531	1.72459	0.607564	0.520519	0.226095
CRC9		CRC	0.0200867	0.132632	0.0104844	0.109614	0.02012	0.396369	0.0342068	1.25183	0.0293034	0.440019	0.0175173	0.0244726	0.00984154	0.0150521	0.0753822	0.0848811	0.54729	0.075846	0.0175784	0.0255821	0.065897	0.573351	0.586488	0.0344748	0	0.0916987	0.00974975	0.0247538	0.808543	0.0246691	0.0673881	0.55996	0.374857	0.110837	0.0025156	0.0271642	1.16547	0.0742068	0.310878	0.0365226	0.00634999	0.0740029	0.13045	1.58366	1.15347	0.434853	0.325713
CRC10		CRC	0.00139185	0.207369	0.0275787	0.0303591	0.0892727	0.299014	0.0329344	2.69493	0.0264688	0.603003	0.0205631	0.00351654	0.0111467	0.014141	0.0296544	0.154002	0.902641	0.0322213	0.0876962	0.0263112	0.0431893	1.01092	0.72064	0.0505035	0.115602	0.270166	0.00573299	0.112851	1.12549	0.00821723	0.0444328	0.745232	0.366219	0.238518	0.0225615	0.0177776	0.65769	0.0673633	0.291895	0.0608085	0.0175492	0.0441069	0.014245	1.8062	0.574533	0.179256	0.219158
CRC11		CRC	0.00754255	0.106043	0.0118479	0	0.0843775	0.231777	0.000642216	0.993971	0.0288472	0.250234	0.00839649	0.015266	0.00175591	0.0108159	0.0493495	0.108351	0.425444	0.0507424	0.0115814	0.0304897	0.0460569	0.532025	0.440764	0.0324022	0	0.0768099	0.0112877	0.0473323	0.505457	0.0149079	0.0452239	0.275506	0.230505	0.076032	0.00168668	0.0129216	0.986814	0	0.181047	0.064941	0.0163003	0.108535	0.175007	1.4334	2.37915	0.560904	0.770244
CRC12		CRC	0.0128503	0	0.00361484	0.107244	0.0858578	5.12835	0	1.98209	0.000525934	2.44647	0	0	1.53326	0.101521	0.171247	0.550897	3.03492	0.478913	8.28562	0.285179	0.309471	1.04454	1.45753	0.86308	0.66717	0.304211	0.142684	0.366943	0.989515	0.185316	1.5015	1.80034	0.522658	0.114244	0.87076	1.07912	0.956862	0.563142	2.45658	0.661591	0.727955	0.668505	0.00979495	0.308757	0.318878	1.46682	0.000611215
CRC13		CRC	0.0244994	0.00195023	0.00258064	0.471313	0.00285514	3.19478	0	3.00801	0.000248012	0.69337	0.0867025	0.93073	2.65485	0	0.0813257	1.03862	6.04408	0.34309	13.7003	0.138668	0.311804	1.25179	0.428313	1.0467	1.17499	3.70996	0.170783	5.48311	2.08159	0.043835	0.475925	9.81377	0.345107	1.71337	0.491818	0.92344	1.29397	0	7.5774	2.83648	0.632904	2.1193	0.0472217	4.25659	30.6018	2.74568	0.0195533
[truncated: 5 more columns]

## Sheet: Raw data Tissue MALDI
List of -CH3/-CD3 ratios from all 13 ion signals (>5% intensity) detected in cancer and normal tissue of cancer patients (n=13) by MALDI/MS
							CH3/CD3 RATIO
Sample name	Group	Glycan 6	Glycan 7	Glycan 10	Glycan 13	Glycan 17	Glycan 25	Glycan 27	Glycan 28	Glycan 33	Glycan 44	Glycan 52	Glycan 58	Glycan 72
CRC1	CRC	29.4118	2.14706	42.6316	6.88571	39.5897	14.5922	7.35	2.75	11.8353	7.60428	2.41328	7.82759	3.15294
CRC2	CRC	62.5	22.75	7.25	4.125	10.5	3.75	1.5	1	2.16667	0.75	0.104444	0.459459	0.1875
CRC3	CRC	11	1	9.66667	2.5	7.6	4.5	7.75	18	4.16667	5.875	0.75	5.14286	0.25
CRC4	CRC	6.88235	0.470588	8.70968	3.52941	5.59091	3.69565	4.88462	3.28571	2.47619	3.33846	1.3662	2.86	1.06897
CRC5	CRC	15.3333	8.66667	3.46154	4.54545	5.14286	5.33333	1.4	0.727273	5.83333	18.2	4.97368		1.625
CRC6	CRC	0.347826	0.108696	0.295082	0.0362694	0.0707965	0.0176211	0.0657534	0.139535	0.023753	0.0511308	0.0471604	0.0560626	0.0787172
CRC7	CRC	7.48	0.28	21.9444	3.46154	14.5833	20.2222	3.03704	0.535714	5.29032	5.75862	2.85827	5.31481	3.35
CRC8	CRC	20.8	6.15	4	18.1111	3.82353	0.923077	11.125	33.5455	3.13333	4.38298	3.67016	3.76744	1.07143
CRC9	CRC	0.203947	0.138158	0.0614525	0.092437	0.0780142	0.0540541	0.0618893	0.0990099	0.0295082	0.0397516	0.0274859	0.0461997	0.274194
CRC10	CRC	3.09091	5.12121	0.808511	0.5	0.914286	0.353846	0.0659341		0.10989	0.0744337	0.0234497	0.0881057	0.0231214
CRC11	CRC	14.6341	26.6341	7.48485	12.8571	12.35	9.8	7.78261	14	3.69231	9.04	4.80617	6.85714	4.02326
CRC12	CRC	6.5	6	6	2.0625	4.8	5.14286	3.5	7	2	1.34848	0.929348	0.966102	1.1129
CRC13	CRC	27.0909	3.18182	23.4	5.33333	17.1667	18.5	4.86667	1.4	5.4	5.61364	14.0992	8.78947	17.1

## Sheet: Raw data Tissue LCMSMS
List of -CH3/-CD3 ratios from all 24 ion signals ( signal/noise > 1000) identified in cancer and normal tissue of cancer patients (n=13) by LC-MS/MS
						CH3/CD3 RATIO
Sample name	Group	Glycan 6	Glycan 13	Glycan 17	Glycan 19	Glycan 22	Glycan 24	Glycan 25	Glycan 26	Glycan 27	Glycan 28	Glycan 33	Glycan 35	Glycan 36	Glycan 41	Glycan 42	Glycan 43	Glycan 44	Glycan 52	Glycan 57	Glycan 64	Glycan 67	Glycan 70	Glycan 74	Glycan 81
CRC1	CRC	0.557241	0.83676	0.0566726	249.312	167.476	2.80044	10.6246	40.7006	1.56381	51.4907	92.2256	12.8279	140.696	20.0987	12.6469	26.123	46.2738	10.0902	15.4482	7.4879	9.61879	1.35583	4.40092	1.57326
CRC2	CRC	18.5745	145.971	0.0064863	0.0157194	53.1723	17.2964	14.9892	31.4703	1.30748	17.1627	116.517	5.51209	113.151	26.1273	4.45349	10.9443	53.3024	6.37784	12.1303	24.8648	7.77073	3.47069	7.20166	0.463755
CRC3	CRC	11.0247	31.2188	0.029394	84.0552	31.4666	16.3043	7.91199	11.408	3.75981	46.8956	86.9355	13.6655	59.975	21.0054	12.691	25.5572	25.5178	5.49088	43.4827	6.60641	5.74191	5.46469	11.3146	0.0835093
CRC4	CRC	2.38856	0.0482168	0.0157911	0.0329026	38.2306	14.3701	6.70226	10.3409	1.77167	13.5448	65.2574	3.32933	142.749	10.2691	4.81887	6.74327	7.1354	2.11633	12.6345	14.6745	23.8247	2.94741	3.34794	0.731458
CRC5	CRC	5.95232	0.281982	0.0259205	0.0390911	84.4159	9.88356	5.97591	5.25797	0.258866	4.19923	5.53604	3.15741	17.2312	27.0853	11.7922	0.28749	16.3115	10.9758	6.19864	8.02557	16.4958	2.74238	0.690325	0.272716
CRC6	CRC	9.21265e-05	0.210047	0.00387415	0.239678	0.0191549	0.0533383	0.100288	0.00687457	0.0321337	0.130534	1.44596	0.0637414	0.0649554	0.0750432	0.0722019	0.00981417	0.0682349	0.224397	2.52353	0.62224	0.13741	0.987608	0.45343	1.38201
CRC7	CRC	0.381076	0.281085	0.0263549	0.0124695	7.41666	0.721153	0.73384	1.64066	0.249157	0.445923	4.4476	0.232873	1.9758	2.27198	0.707329	1.34022	1.09335	0.458693	1.75788	7.78457	1.40443	0.794526	0.719971	2.16232
CRC8	CRC	7.85199	7.07829	0.0233696	0.017475	110.193	6.89439	6.14412	24.5796	2.91753	43.4775	32.6651	3.37393	35.8037	20.1019	3.17811	7.67099	3.94787	1.47833	7.29103	3.75091	13.979	1.04212	2.38116	10.073
CRC9	CRC	0.399623	0.222993	0.00848672	0.0568876	1.43615	0.723236	0.282877	0.228727	0.0721043	0.789933	0.523902	0.0339115	0.775142	0.235791	0.0804167	0.401952	0.0647797	0.049263	0.972462	0.454638	0.119999	0.9954	0.0749918	1.61381
CRC10	CRC	1.49063	2.88655	0.112546	1.25209	4.60698	0.917966	0.95447	1.37398	0.124702	1.83984	1.14763	0.122398	1.69911	1.03969	0.0485942	1.05637	0.22541	0.0971714	2.31905	2.54037	0.71887	0.318638	0.100136	6.99678
CRC11	CRC	2.05417	2.6322	0.00853292	1.38967	6.39287	1.70845	1.63489	3.4317	0.0179478	5.27092	16.7594	0.634162	56.2907	4.51944	1.02046	1.91143	1.8051	0.906412	4.51637	11.358	9.24293	1.31854	0.42111	0.285236
CRC12	CRC	1.73929	0.847524	0.705848	0.641506	5.63295	1.17811	0.842089	4.56987	0.500936	0.598665	1.80633	0.699136	17.1685	0.158603	6.86856	10.3106	1.50044	1.40857	1.75921	1.18544	3.61835	0.425722	33.377	2.86426
CRC13	CRC	4033.32	0.55047	0.0744722	13.5472	136.412	74.7647	44.5161	26.6941	0.140528	19.5529	123.432	55.2634	587.412	59.2101	56.6427	14.2921	89.7472	82.3263	26.0123	19.2824	5.50456	1.30297	15.3304	0.651589
